# Supplementary material
Source: PubMed Central journal article supplement (PMC7872734)
Supplement: JSLHR-63-2535-s001.pdf [file JSLHR-63-2535-s001.pdf]

### **List One: Prime–Target**

|              |               |
|--------------|---------------|
| jite–fauer   | trin–phy      |
| grize–yise   | nobe–drobe    |
| kow–deeb     | gox–brocks    |
| dreat–ged    | frield–geeled |
| murze–thurze | dat–lat       |
| yi–marp      | fum–zi        |
| grood–bood   | ked–voo       |
| dabe–lum     | nilled–dilled |
| clate–pline  | kile–spile    |
| mun–lun      | shum–hane     |
| ky–tate      | jate–yate     |
| vease–meeze  | doan–pone     |
| bry–pag      | zare–jare     |
| crail–lale   | kun–gree      |
| demp–semp    | crute–doot    |
| zeer–pud     | yocks–toos    |
| nake–dake    | blug–kroar    |
| siff–piff    | pake–spake    |
| stam–glig    | gour–druze    |
| daf–coom     | vore–jore     |
| trum–pum     | maft–yaft     |
| drere–vair   | bro–slore     |
| gines–rabe   | nin–rin       |
| floos–cho    | drig–stug     |
| sarp–cly     | gite–clite    |
| chole–thole  | nool–shull    |
| dorde–morde  | mag–yare      |
| gee–blail    | blauer–flam   |
| blane–vox    | sare–nare     |
| poom–dite    | foo–breet     |
| daip–laip    | fam–cham      |
| feap–neap    | vite–balf     |
| bome–slines  | prail–stobe   |
| nef–gef      | stee–kwee     |
| pooze–lauer  | chuz–luz      |
| moce–boce    | taid–chy      |
| thore–slin   | plol–groll    |
| bly–gry      | rine–clum     |
| doode–keer   | neeb–stide    |
| glir–flir    | poat–hoat     |
| blore–plo    | quo–zow       |
| mide–gome    | slair–jun     |
| poe–trow     | ji–claid      |
| plew–snew    | krobe–zite    |

## **List Two: Prime–Target**

|              |              |
|--------------|--------------|
| foo–voo      | plol–neap    |
| nin–laip     | trum–dake    |
| bro–plo      | kile–pone    |
| dorde–gry    | glir–meeze   |
| plew–dilled  | vore–lun     |
| gour–lauer   | doan–lat     |
| murze–hoat   | floos–toos   |
| daip–piff    | daf–balf     |
| stee–spile   | poom–coom    |
| trin–slin    | bry–chy      |
| grize–morde  | feap–vair    |
| nobe–kwee    | jite–zite    |
| blug–stug    | gines–slines |
| blore–slore  | crute–lale   |
| shum–lum     | chuz–semp    |
| nake–trow    | pake–brocks  |
| moce–rin     | crail–thole  |
| jate–yise    | fam–zow      |
| groom–nare   | siff–jore    |
| rine–pline   | sarp–marp    |
| stam–flam    | zeer–keer    |
| blauer–fauer | clate–tate   |
| nilled–groll | pooze–druze  |
| mag–pag      | gite–thurze  |
| neeb–deeb    | chole–pum    |
| quo–jare     | ky–phy       |
| gox–luz      | demp–geeled  |
| gee–gree     | dreat–breet  |
| fum–clum     | bome–gome    |
| kow–cho      | doode–pud    |
| drig–glig    | poat–spake   |
| nef–doot     | vite–dite    |
| dabe–rabe    | maft–snew    |
| poe–flir     | prail–blail  |
| sare–cham    | ked–ged      |
| mun–gef      | yocks–vox    |
| krobe–stobe  | vease–boce   |
| yi–cly       | zare–yaft    |
| blane–hane   | bly–shull    |
| frield–bood  | taid–claid   |
| kun–jun      | mide–stide   |
| throre–kroar | drere–yate   |
| dat–clite    | ji–zi        |
| nool–drobe   | slair–yare   |
